# Supplementary material for: Fault Detection of Landing Gear Retraction/Extension Hydraulic System Based on Bond Graph-Linear Fractional Transformation Technique and Interval Analytic Redundancy Relations
Source: MDPI journal article supplement (doi:10.3390/app12199667), 2022-09-26
Supplement: s1 [file s1]

# Fault Detection of Landing Gear Retraction/Extension Hydraulic System Based on Bond Graph-linear Fractional Transformation Technique and Interval Analytic Redundancy Relations

## Table of Contents

|                                                             |   |
|-------------------------------------------------------------|---|
| Figure S1. The relative error level of Figure 18 (a). ..... | 2 |
| Figure S2. The relative error level of Figure 18 (c). ..... | 2 |
| Figure S3. The relative error level of Figure 19 (a). ..... | 3 |
| Figure S4. The relative error level of Figure 19 (b). ..... | 3 |

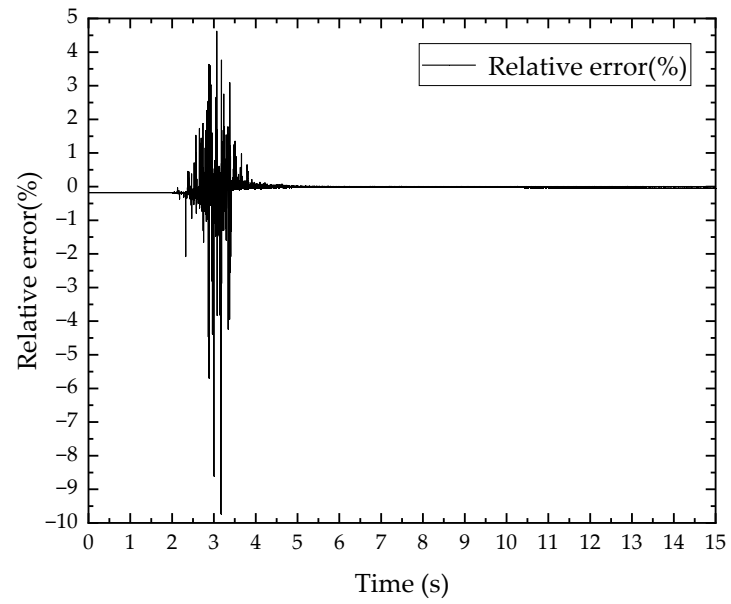

**Figure S1. The relative error level of Figure 18 (a).**

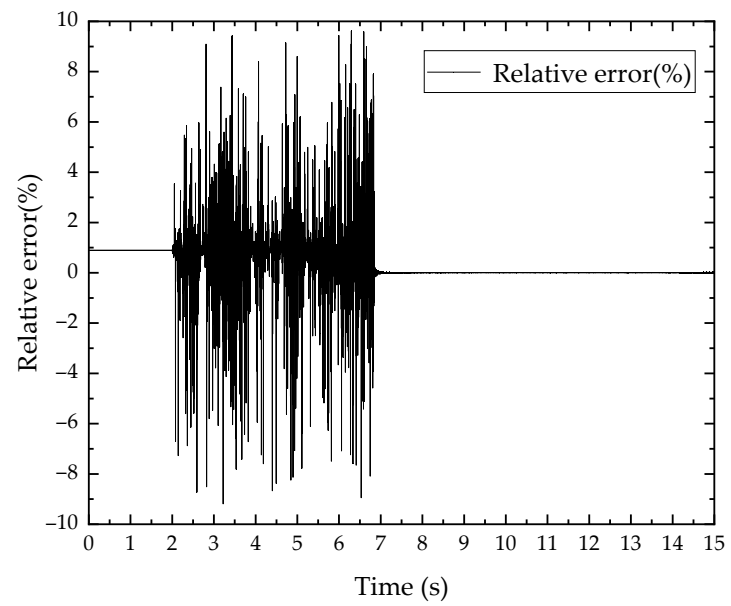

**Figure S2. The relative error level of Figure 18 (c).**

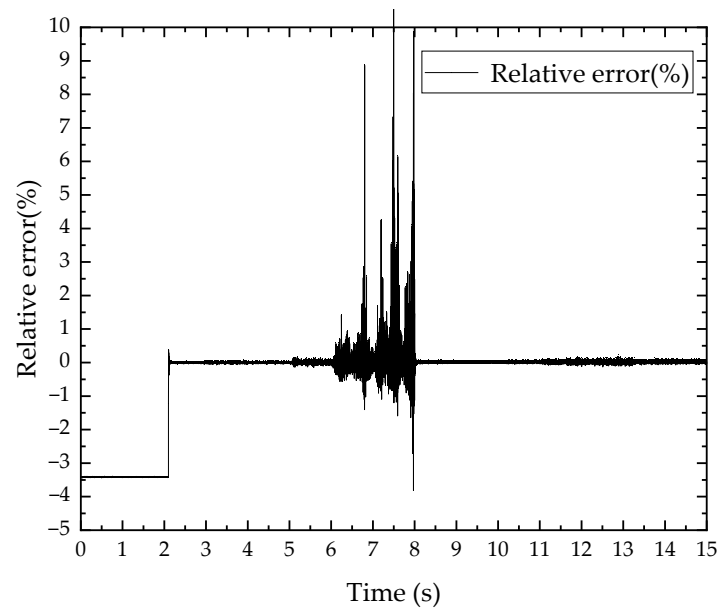

**Figure S3. The relative error level of Figure 19 (a).**

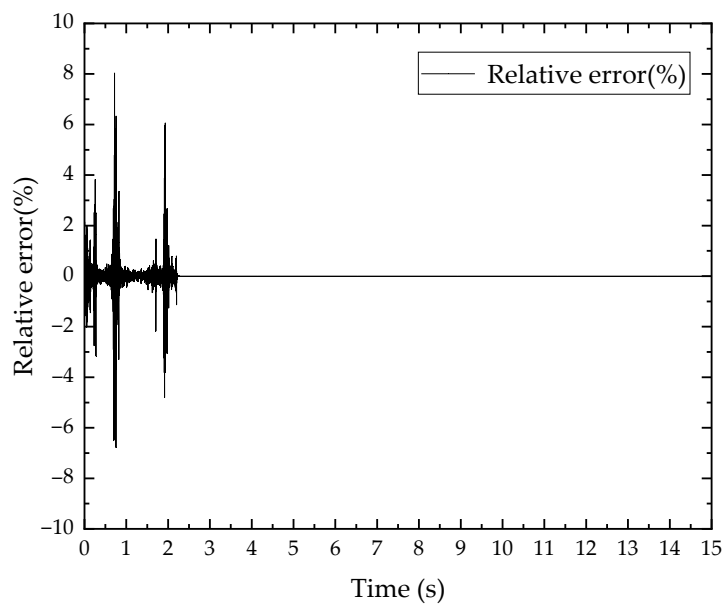

**Figure S4. The relative error level of Figure 18 (b).**
